# Supplementary material
Source: PubMed Central journal article supplement (PMC1440311)
Supplement: 7601034s3.pdf [file 7601034s3.pdf]

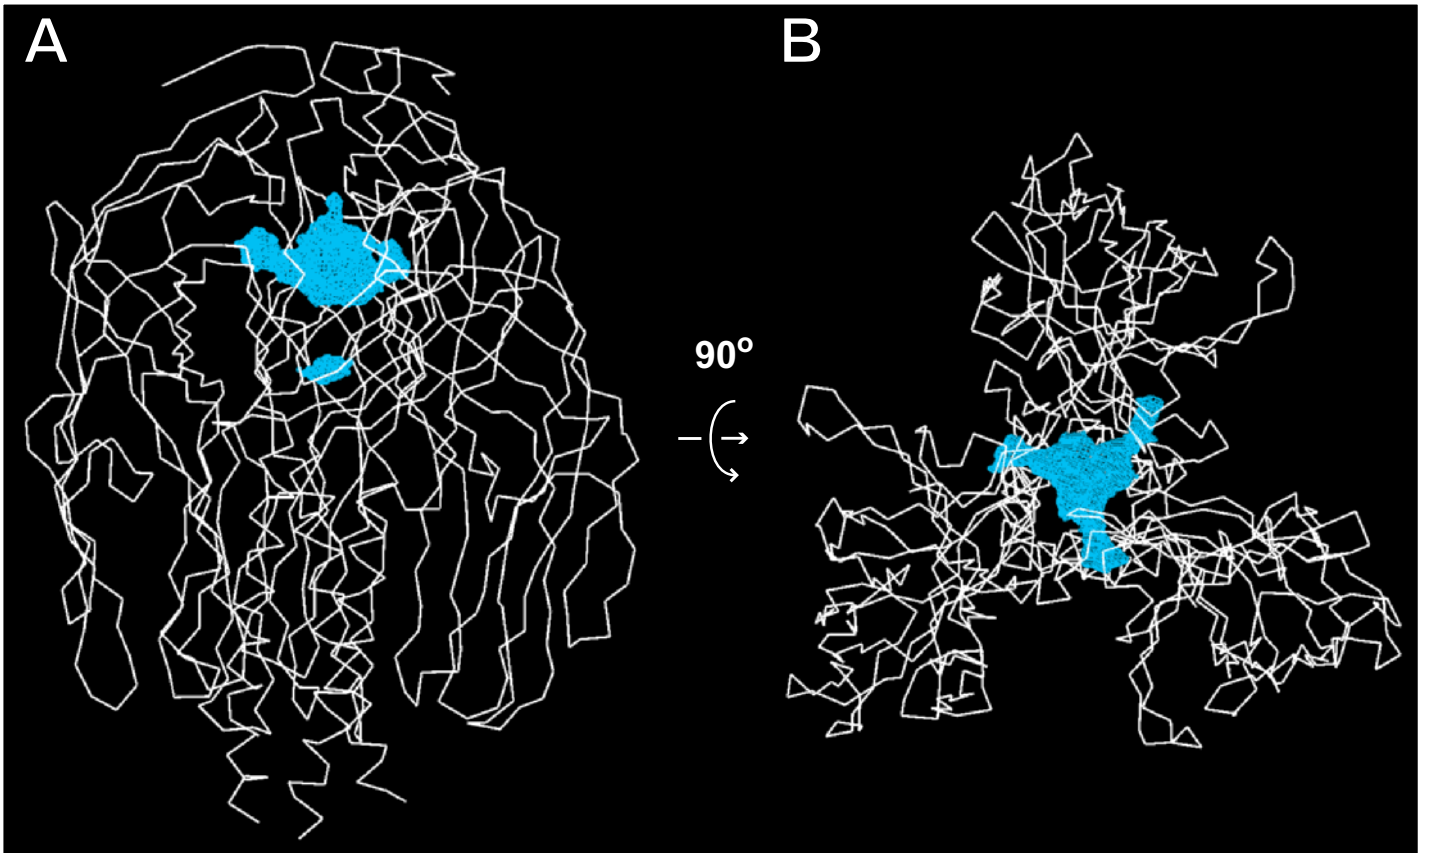

Internal cavities of VP5CT. Mesh models (cyan) of the internal cavities are shown within line drawings (white) of the VP5CT C $\alpha$  trace. The mesh models show the volume accessible to a probe with a 1.4 Å radius, reflecting the volume potentially accessible to solvent. **(A)** Viewed from the side. **(B)** Viewed from the top.
